# Supplementary figures and images for: Experience of road and other trauma by the opiate dependent patient: a survey report
Source: Springer Nature journal article supplement (doi:10.1186/1747-597x-3-10), 2008-05-03

**A****No. Cars Hit, SUD vs. N-SUD**

$$\text{N-SUD} = 0.3608 + 0.0079 * x$$

$$\text{SUD} = 0.6495 + 0.0428 * x$$

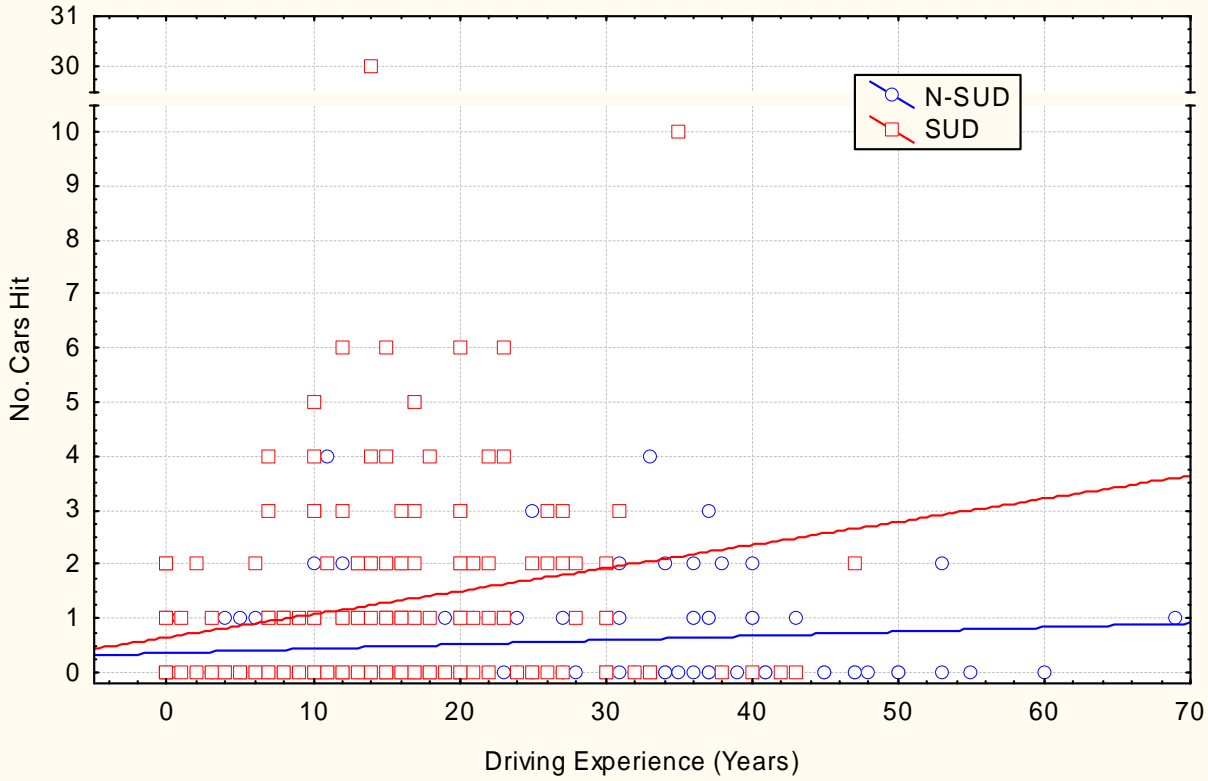**B****No. Cars Repaired, SUD vs. N-SUD**

$$\text{N-SUD} = 0.4829 + 0.0279 * x$$

$$\text{SUD} = 0.7422 + 0.074 * x$$

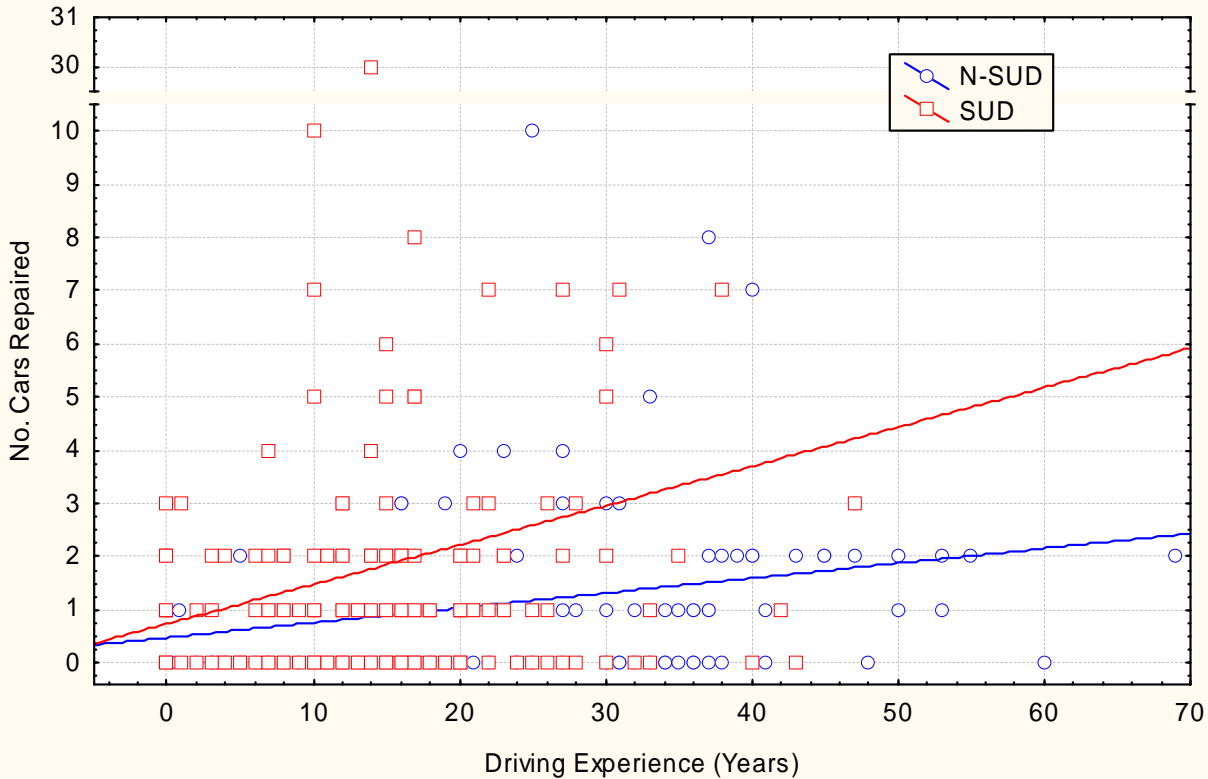

Supplement: 13011_2007_82_MOESM4_ESM.pdf [file 13011_2007_82_MOESM4_ESM.pdf]
